# Supplementary material
Source: PubMed Central journal article supplement (PMC3806720)
Supplement: NIHMS520178-supplement-01.pdf [file NIHMS520178-supplement-01.pdf]

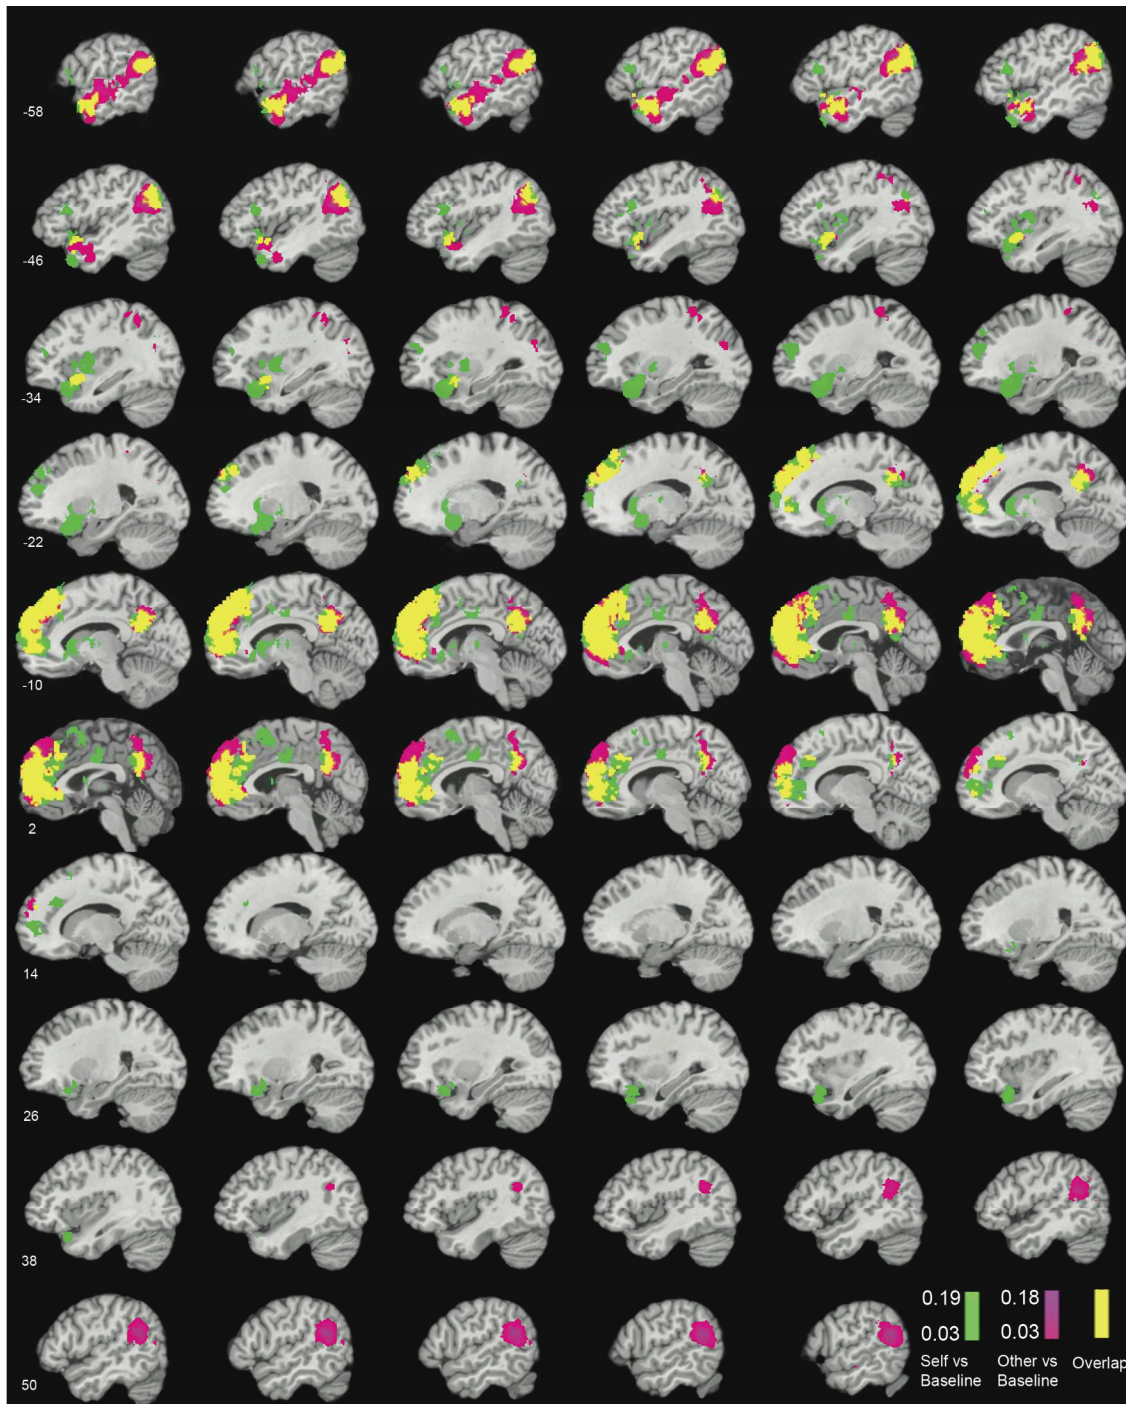

Supplementary Figure 1. Montage showing Self vs. Baseline (Green) and Other vs. Baseline (Magenta), with Overlap shown in Yellow. Color gradients for Self vs. Baseline and Other vs. Baseline show activation proportion differentials between conditions (FWE-corrected,  $p < 0.05$ ). Coordinates shown are in MNI space.

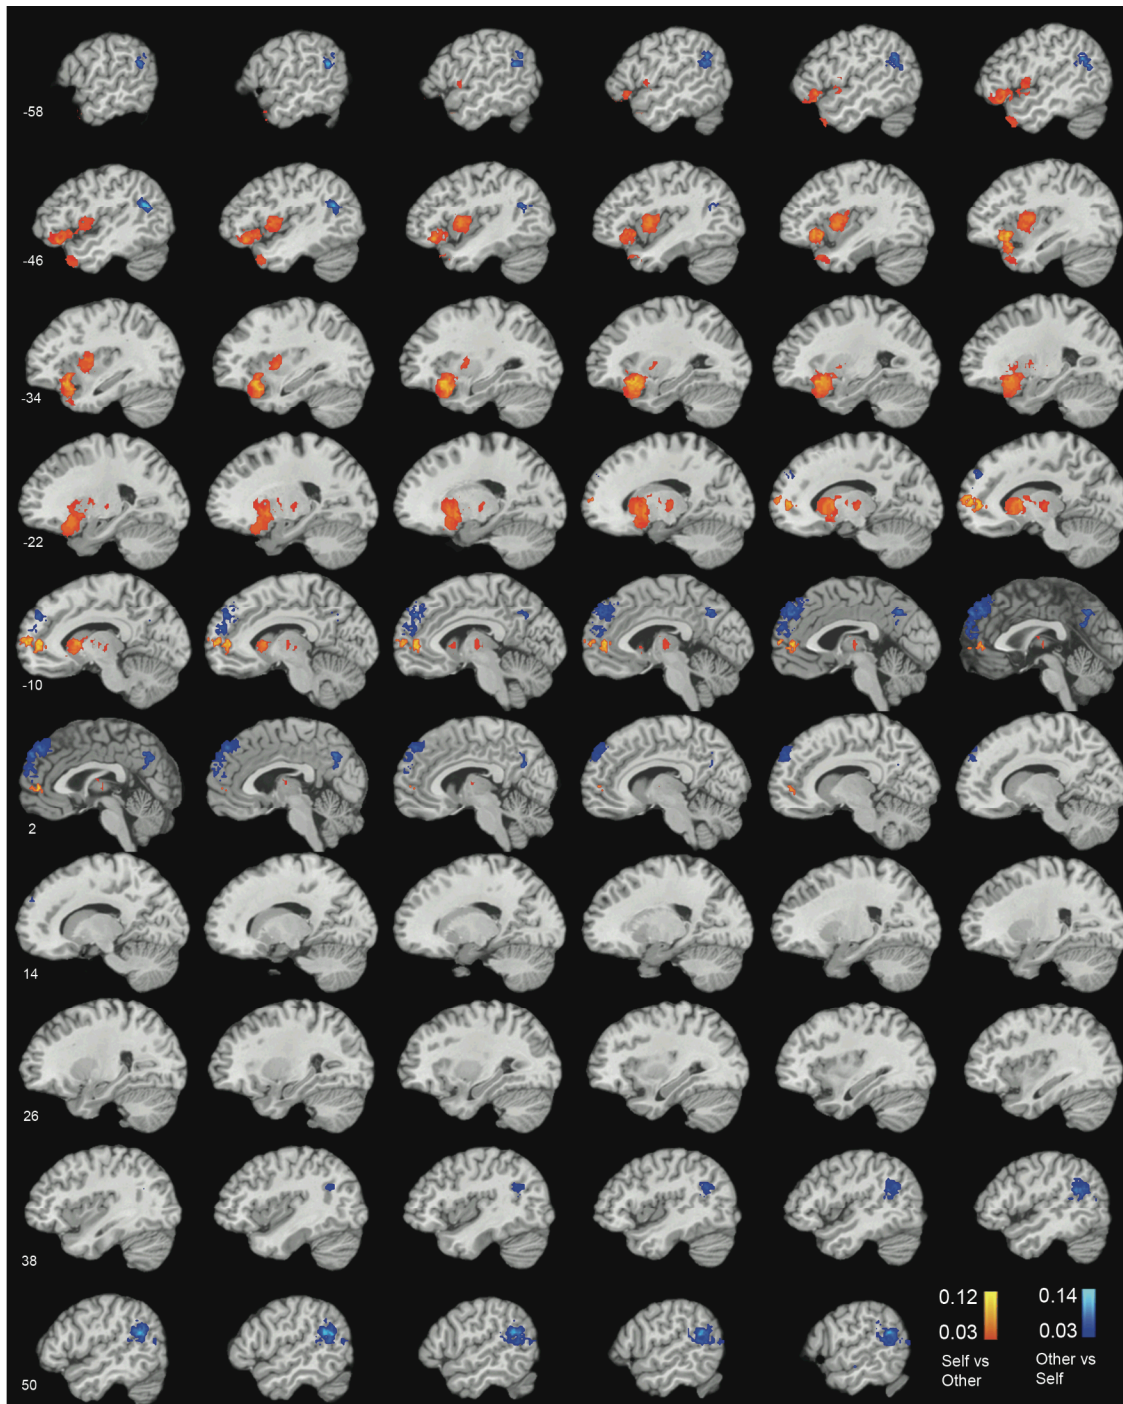

Supplementary Figure 2. Montage showing Self vs. Other (Orange) and Other vs. Self (Blue) MKDA Results. Color gradients show activation proportion differentials between conditions (FWE-corrected,  $p < 0.05$ ). Coordinates shown are in MNI space.

Supplementary Table 1. Summaries of studies included in the meta-analytic database

| <b>First Author</b> | <b>Year</b> | <b>Modality</b> | <b>N</b> | <b>Total<br/>Contrasts</b> | <b>Self</b> | <b>Other</b> | <b>Baseline</b> |
|---------------------|-------------|-----------------|----------|----------------------------|-------------|--------------|-----------------|
| Aichhorn            | 2006        | fMRI            | 18       | 3                          | 0           | 2            | 0               |
| Baron-Cohen         | 1999        | fMRI            | 12       | 1                          | 0           | 1            | 0               |
| Berthoz             | 2002        | fMRI            | 12       | 4                          | 0           | 0            | 0               |
| Blackwood           | 2003        | fMRI            | 12       | 4                          | 1           | 1            | 0               |
| Blakemore           | 2007        | fMRI            | 11       | 1                          | 1           | 0            | 0               |
| Blouin              | 2004        | PET             | 7        | 2                          | 0           | 0            | 0               |
| Bristow             | 2007        | fMRI            | 12       | 6                          | 0           | 0            | 0               |
| Brunet              | 2000        | PET             | 8        | 4                          | 0           | 1            | 1               |
| Cabeza              | 2004        | fMRI            | 13       | 2                          | 0           | 0            | 1               |
| Calarge             | 2003        | PET             | 13       | 2                          | 0           | 1            | 1               |
| Castelli            | 2000        | PET             | 6        | 1                          | 0           | 1            | 0               |
| Cato                | 2004        | fMRI            | 26       | 3                          | 0           | 0            | 0               |
| Chan                | 2004        | fMRI            | 10       | 3                          | 0           | 1            | 0               |
| Ciaramidaro         | 2007        | fMRI            | 12       | 3                          | 0           | 3            | 0               |
| Corden              | 2006        | fMRI            | 24       | 1                          | 0           | 0            | 0               |
| Craik               | 1999        | PET             | 8        | 4                          | 2           | 2            | 0               |
| D'Argembeau         | 2007        | fMRI            | 17       | 2                          | 0           | 1            | 0               |
| Decety              | 2004        | fMRI            | 12       | 4                          | 0           | 2            | 0               |
| den Ouden           | 2005        | fMRI            | 11       | 4                          | 2           | 0            | 1               |
| Denkova             | 2006        | fMRI            | 10       | 1                          | 1           | 0            | 0               |
| Devue               | 2007        | fMRI            | 20       | 5                          | 3           | 2            | 0               |
| Farrer              | 2002        | fMRI            | 12       | 4                          | 2           | 2            | 0               |
| Farrow              | 2001        | fMRI            | 10       | 2                          | 0           | 2            | 0               |
| Fletcher            | 1995        | PET             | 6        | 3                          | 0           | 2            | 0               |
| Fossati             | 2003        | fMRI            | 10       | 1                          | 1           | 0            | 0               |
| Fossati             | 2004        | fMRI            | 11       | 3                          | 0           | 0            | 0               |
| Gallagher           | 2000        | fMRI            | 6        | 3                          | 0           | 2            | 0               |
| Gilbert             | 2007        | fMRI            | 16       | 1                          | 0           | 1            | 0               |
| Gobbini             | 2007        | fMRI            | 12       | 6                          | 0           | 1            | 2               |
| Greene              | 2004        | fMRI            | 41       | 4                          | 0           | 0            | 0               |
| Grezes              | 2004        | fMRI            | 6        | 2                          | 1           | 0            | 0               |
| Gu                  | 2007        | fMRI            | 12       | 4                          | 0           | 0            | 0               |
| Gusnard             | 2001        | fMRI            | 24       | 3                          | 2           | 0            | 0               |
| Gutchess            | 2007        | fMRI            | 36       | 2                          | 1           | 1            | 0               |
| Harris              | 2005        | fMRI            | 12       | 1                          | 0           | 0            | 0               |
| Heatherton          | 2006        | fMRI            | 30       | 4                          | 2           | 2            | 0               |
| Hynes               | 2006        | fMRI            | 18       | 5                          | 0           | 0            | 1               |
| Iacoboni            | 2004        | fMRI            | 13       | 1                          | 0           | 1            | 0               |
| Iacoboni            | 2005        | fMRI            | 23       | 5                          | 0           | 2            | 2               |
| Jackson             | 2005        | fMRI            | 15       | 1                          | 0           | 0            | 0               |
| Jackson             | 2006        | fMRI            | 18       | 2                          | 1           | 1            | 0               |
| Johnson, M.K.       | 2006        | fMRI            | 19*      | 10                         | 4           | 4            | 0               |
| Johnson, S.C.       | 2002        | fMRI            | 11       | 1                          | 1           | 0            | 0               |
| Johnson, S.C.       | 2005        | fMRI            | 17       | 3                          | 2           | 0            | 0               |
| Johnson, S.C.       | 2007        | fMRI            | 110      | 1                          | 1           | 0            | 0               |



|                    |      |      |     |   |   |   |   |
|--------------------|------|------|-----|---|---|---|---|
| Kelley             | 2002 | fMRI | 21  | 3 | 1 | 0 | 0 |
| Kircher            | 2000 | fMRI | 6   | 4 | 2 | 0 | 1 |
| Kircher            | 2001 | fMRI | 6   | 2 | 1 | 0 | 0 |
| Kircher            | 2002 | fMRI | 6   | 2 | 2 | 0 | 0 |
| Kjaer              | 2002 | PET  | 7   | 2 | 2 | 0 | 0 |
| Kobayashi          | 2006 | fMRI | 16  | 3 | 0 | 0 | 0 |
| Lamm               | 2007 | fMRI | 17  | 3 | 1 | 1 | 0 |
| Lawrence           | 2006 | fMRI | 12  | 1 | 1 | 0 | 0 |
| Levine             | 2004 | fMRI | 5   | 2 | 1 | 0 | 0 |
| Lieberman          | 2004 | fMRI | 22  | 2 | 0 | 0 | 0 |
| Lou                | 2004 | PET  | 13  | 6 | 2 | 2 | 2 |
| Macrae             | 2004 | fMRI | 22  | 2 | 0 | 0 | 0 |
| Martin             | 2003 | fMRI | 12  | 3 | 0 | 2 | 1 |
| Mitchell           | 2002 | fMRI | 14  | 2 | 0 | 1 | 1 |
| Mitchell           | 2004 | fMRI | 17  | 3 | 0 | 1 | 1 |
| Mitchell (a)       | 2005 | fMRI | 14  | 4 | 0 | 0 | 1 |
| Mitchell (b)       | 2005 | fMRI | 19  | 1 | 0 | 0 | 0 |
| Mitchell (c)       | 2005 | fMRI | 18  | 2 | 0 | 0 | 1 |
| Mitchell (a)       | 2006 | fMRI | 15  | 2 | 0 | 0 | 0 |
| Mitchell (b)       | 2006 | fMRI | 15  | 3 | 0 | 0 | 1 |
| Mitchell           | 2008 | fMRI | 20  | 1 | 0 | 1 | 0 |
| Nakamura           | 2001 | PET  | 9   | 2 | 1 | 1 | 0 |
| Nunez              | 2005 | fMRI | 20  | 3 | 1 | 0 | 0 |
| Ochsner (a)        | 2004 | fMRI | 24  | 8 | 1 | 2 | 1 |
| Ochsner (b)        | 2004 | fMRI | 13  | 4 | 2 | 2 | 0 |
| Ochsner            | 2005 | fMRI | 17* | 6 | 3 | 3 | 0 |
| Ortigue            | 2007 | fMRI | 36  | 4 | 0 | 1 | 0 |
| Paulus             | 2003 | fMRI | 15  | 1 | 1 | 0 | 0 |
| Pfeifer            | 2007 | fMRI | 12  | 4 | 2 | 2 | 0 |
| Phan               | 2003 | fMRI | 8   | 3 | 0 | 0 | 0 |
| Piefke             | 2003 | fMRI | 20  | 4 | 1 | 0 | 0 |
| Piefke             | 2005 | fMRI | 20  | 1 | 1 | 0 | 0 |
| Pietrini           | 2000 | PET  | 15  | 3 | 0 | 0 | 0 |
| Platek             | 2004 | fMRI | 5   | 2 | 1 | 1 | 0 |
| Platek             | 2006 | fMRI | 12  | 5 | 2 | 1 | 0 |
| Ramnani            | 2004 | fMRI | 12  | 3 | 1 | 0 | 0 |
| Ruby               | 2003 | PET  | 10  | 2 | 1 | 1 | 0 |
| Ruby               | 2004 | PET  | 10  | 5 | 1 | 1 | 0 |
| Saxe               | 2003 | fMRI | 25* | 2 | 0 | 2 | 0 |
| Saxe               | 2005 | fMRI | 12  | 1 | 0 | 0 | 0 |
| Saxe (a)           | 2006 | fMRI | 12  | 3 | 0 | 1 | 0 |
| Saxe (b)           | 2006 | fMRI | 12  | 1 | 0 | 1 | 0 |
| Schmitz            | 2004 | fMRI | 18  | 3 | 2 | 1 | 0 |
| Schmitz            | 2006 | fMRI | 15  | 2 | 1 | 0 | 1 |
| Schnider           | 2000 | PET  | 8   | 2 | 0 | 0 | 0 |
| Schulte-<br>Ruther | 2007 | fMRI | 26  | 1 | 1 | 0 | 0 |
| Schultz            | 2004 | fMRI | 16  | 3 | 0 | 0 | 0 |
| Schultz            | 2005 | fMRI | 12  | 1 | 0 | 0 | 0 |

|               |      |      |    |   |   |   |   |
|---------------|------|------|----|---|---|---|---|
| Seger         | 2004 | fMRI | 12 | 6 | 2 | 2 | 2 |
| Singer        | 2004 | fMRI | 16 | 4 | 0 | 0 | 0 |
| Sommer        | 2007 | fMRI | 16 | 2 | 0 | 0 | 0 |
| Spence        | 2001 | fMRI | 10 | 3 | 0 | 0 | 0 |
| Sugiura       | 2000 | PET  | 9  | 3 | 2 | 0 | 0 |
| Sui           | 2007 | fMRI | 12 | 1 | 1 | 0 | 0 |
| Takahashi (a) | 2004 | fMRI | 15 | 1 | 0 | 0 | 0 |
| Takahashi (b) | 2004 | fMRI | 19 | 4 | 0 | 0 | 0 |
| Todorov       | 2007 | fMRI | 11 | 3 | 0 | 1 | 2 |
| Treyer        | 2003 | PET  | 8  | 1 | 0 | 0 | 0 |
| Vogeley       | 2001 | fMRI | 8  | 5 | 3 | 2 | 0 |
| Vollm         | 2006 | fMRI | 15 | 3 | 0 | 0 | 0 |
| Zhu           | 2007 | fMRI | 13 | 6 | 2 | 4 | 0 |
| Zysset        | 2003 | fMRI | 18 | 1 | 0 | 0 | 0 |

Contrast totals are shown for each study, followed by the number of contrasts that were coded as Self, Other, and Baseline in this meta-analysis.

\*Johnson et al. (2006) had N=19 in Experiment 1 and N=11 in Experiment 2; Ochsner et al. (2005) had N=17 in Experiment 1 and N=16 in Experiment 2; and Saxe & Kanwisher (2003) had N=25 in Experiment 1 and N=21 in Experiment 2.

## Supplementary Table 2. Publications included in the meta-analysis

- Aichhorn, M., Perner, J., Kronbichler, M., Staffen, W., & Ladurner, G. (2006). Do visual perspective tasks need theory of mind? *Neuroimage*, 30(3), 1059-1068.
- Baron-Cohen, S., Ring, H. A., Wheelwright, S., Bullmore, E. T., Brammer, M. J., Simmons, A., et al. (1999). Social intelligence in the normal and autistic brain: an fMRI study. *Eur J Neurosci*, 11(6), 1891-1898.
- Berthoz, S., Armony, J. L., Blair, R. J., & Dolan, R. J. (2002). An fMRI study of intentional and unintentional (embarrassing) violations of social norms. *Brain*, 125(Pt 8), 1696-1708.
- Blackwood, N. J., Bentall, R. P., ffytche, D. H., Simmons, A., Murray, R. M., & Howard, R. J. (2003). Self-responsibility and the self-serving bias: an fMRI investigation of causal attributions. *Neuroimage*, 20(2), 1076-1085.
- Blakemore, S. J., den Ouden, H., Choudhury, S., & Frith, C. (2007). Adolescent development of the neural circuitry for thinking about intentions. *Soc Cogn Affect Neurosci*, 2(2), 130-139.
- Blouin, J. S., Bard, C., & Paillard, J. (2004). Contribution of the cerebellum to self-initiated synchronized movements: a PET study. *Exp Brain Res*, 155(1), 63-68.
- Bristow, D., Rees, G., & Frith, C. D. (2007). Social interaction modifies neural response to gaze shifts. *Soc Cogn Affect Neurosci*, 2(1), 52-61.
- Brunet, E., Sarfati, Y., Hardy-Bayle, M. C., & Decety, J. (2000). A PET investigation of the attribution of intentions with a nonverbal task. *Neuroimage*, 11(2), 157-166.
- Cabeza, R., Prince, S. E., Daselaar, S. M., Greenberg, D. L., Budde, M., Dolcos, F., et al. (2004). Brain activity during episodic retrieval of autobiographical and laboratory events: an fMRI study using a novel photo paradigm. *J Cogn Neurosci*, 16(9), 1583-1594.
- Calarge, C., Andreasen, N. C., & O'Leary, D. S. (2003). Visualizing how one brain understands another: a PET study of theory of mind. *Am J Psychiatry*, 160(11), 1954-1964.
- Castelli, F., Happe, F., Frith, U., & Frith, C. (2000). Movement and mind: a functional imaging study of perception and interpretation of complex intentional movement patterns. *Neuroimage*, 12(3), 314-325.
- Cato, M. A., Crosson, B., Gokcay, D., Soltysik, D., Wierenga, C., Gopinath, K., et al. (2004). Processing words with emotional connotation: an FMRI study of time course and laterality in rostral frontal and retrosplenial cortices. *J Cogn Neurosci*, 16(2), 167-177.
- Chan, A. W., Peelen, M. V., & Downing, P. E. (2004). The effect of viewpoint on body representation in the extrastriate body area. *Neuroreport*, 15(15), 2407-2410.
- Ciaramidaro, A., Adenzato, M., Enrici, I., Erk, S., Pia, L., Bara, B. G., et al. (2007). The intentional network: how the brain reads varieties of intentions. *Neuropsychologia*, 45(13), 3105-3113.
- Corden, B., Critchley, H. D., Skuse, D., & Dolan, R. J. (2006). Fear recognition ability predicts differences in social cognitive and neural functioning in men. *J Cogn Neurosci*, 18(6), 889-897.
- Craik, F. I. M., Moroz, T. M., Moscovitch, M., Stuss, D. T., Winocur, G., Tulving, E., et al. (1999). In search of the self: A positron emission tomography study. *Psychological Science*, 10(1), 26-34.
- D'Argembeau, A., Ruby, P., Collette, F., Degueldre, C., Balteau, E., Luxen, A., et al. (2007). Distinct regions of the medial prefrontal cortex are associated with self-referential processing and perspective taking. *J Cogn Neurosci*, 19(6), 935-944.

- Decety, J., Jackson, P. L., Sommerville, J. A., Chaminade, T., & Meltzoff, A. N. (2004). The neural bases of cooperation and competition: an fMRI investigation. *Neuroimage*, 23(2), 744-751.
- den Ouden, H. E., Frith, U., Frith, C., & Blakemore, S. J. (2005). Thinking about intentions. *Neuroimage*, 28(4), 787-796.
- Denkova, E., Botzung, A., Scheiber, C., & Manning, L. (2006). Implicit emotion during recollection of past events: a nonverbal fMRI study. *Brain Res*, 1078(1), 143-150.
- Devue, C., Collette, F., Balteau, E., Degueldre, C., Luxen, A., Maquet, P., et al. (2007). Here I am: the cortical correlates of visual self-recognition. *Brain Res*, 1143, 169-182.
- Farrer, C., & Frith, C. D. (2002). Experiencing oneself vs. another person as being the cause of an action: the neural correlates of the experience of agency. *Neuroimage*, 15(3), 596-603.
- Farrow, T. F., Zheng, Y., Wilkinson, I. D., Spence, S. A., Deakin, J. F., Tarriner, N., et al. (2001). Investigating the functional anatomy of empathy and forgiveness. *Neuroreport*, 12(11), 2433-2438.
- Fletcher, P. C., Happe, F., Frith, U., Baker, S. C., Dolan, R. J., Frackowiak, R. S., et al. (1995). Other minds in the brain: a functional imaging study of "theory of mind" in story comprehension. *Cognition*, 57(2), 109-128.
- Fossati, P., Hevenor, S. J., Graham, S. J., Grady, C., Keightley, M. L., Craik, F., et al. (2003). In search of the emotional self: an fMRI study using positive and negative emotional words. *Am J Psychiatry*, 160(11), 1938-1945.
- Fossati, P., Hevenor, S. J., Lepage, M., Graham, S. J., Grady, C., Keightley, M. L., et al. (2004). Distributed self in episodic memory: neural correlates of successful retrieval of self-encoded positive and negative personality traits. *Neuroimage*, 22(4), 1596-1604.
- Gallagher, H. L., Happe, F., Brunswick, N., Fletcher, P. C., Frith, U., & Frith, C. D. (2000). Reading the mind in cartoons and stories: an fMRI study of 'theory of mind' in verbal and nonverbal tasks. *Neuropsychologia*, 38(1), 11-21.
- Gilbert, S. J., Williamson, I. D., Dumontheil, I., Simons, J. S., Frith, C. D., & Burgess, P. W. (2007). Distinct regions of medial rostral prefrontal cortex supporting social and nonsocial functions. *Soc Cogn Affect Neurosci*, 2(3), 217-226.
- Gobbini, M. I., Koralek, A. C., Bryan, R. E., Montgomery, K. J., & Haxby, J. V. (2007). Two takes on the social brain: a comparison of theory of mind tasks. *J Cogn Neurosci*, 19(11), 1803-1814.
- Greene, J. D., Nystrom, L. E., Engell, A. D., Darley, J. M., & Cohen, J. D. (2004). The neural bases of cognitive conflict and control in moral judgment. *Neuron*, 44(2), 389-400.
- Grezes, J., Frith, C. D., & Passingham, R. E. (2004). Inferring false beliefs from the actions of oneself and others: an fMRI study. *Neuroimage*, 21(2), 744-750.
- Gu, X., & Han, S. (2007). Attention and reality constraints on the neural processes of empathy for pain. *Neuroimage*, 36(1), 256-267.
- Gusnard, D. A., Akbudak, E., Shulman, G. L., & Raichle, M. E. (2001). Medial prefrontal cortex and self-referential mental activity: relation to a default mode of brain function. *Proc Natl Acad Sci U S A*, 98(7), 4259-4264.
- Gutchess, A. H., Kensinger, E. A., & Schacter, D. L. (2007). Aging, self-referencing, and medial prefrontal cortex. *Soc Neurosci*, 2(2), 117-133.
- Harris, L. T., Todorov, A., & Fiske, S. T. (2005). Attributions on the brain: neuro-imaging dispositional inferences, beyond theory of mind. *Neuroimage*, 28(4), 763-769.

- Heatherton, T. F., Wyland, C. L., Macrae, C. N., Demos, K. E., Denny, B. T., & Kelley, W. M. (2006). Medial prefrontal activity differentiates self from close others. *Soc Cogn Affect Neurosci*, 1(1), 18-25.
- Hynes, C. A., Baird, A. A., & Grafton, S. T. (2006). Differential role of the orbital frontal lobe in emotional versus cognitive perspective-taking. *Neuropsychologia*, 44(3), 374-383.
- Iacoboni, M., Lieberman, M. D., Knowlton, B. J., Molnar-Szakacs, I., Moritz, M., Throop, C. J., et al. (2004). Watching social interactions produces dorsomedial prefrontal and medial parietal BOLD fMRI signal increases compared to a resting baseline. *Neuroimage*, 21(3), 1167-1173.
- Iacoboni, M., Molnar-Szakacs, I., Gallese, V., Buccino, G., Mazziotta, J. C., & Rizzolatti, G. (2005). Grasping the intentions of others with one's own mirror neuron system. *PLoS Biol*, 3(3), e79.
- Jackson, P. L., Brunet, E., Meltzoff, A. N., & Decety, J. (2006). Empathy examined through the neural mechanisms involved in imagining how I feel versus how you feel pain. *Neuropsychologia*, 44(5), 752-761.
- Jackson, P. L., Meltzoff, A. N., & Decety, J. (2005). How do we perceive the pain of others? A window into the neural processes involved in empathy. *Neuroimage*, 24(3), 771-779.
- Johnson, M. K., Raye, C. L., Mitchell, K. J., Touryan, S. R., Greene, E. J., & Nolen-Hoeksema, S. (2006). Dissociating medial frontal and posterior cingulate activity during self-reflection. *Soc Cogn Affect Neurosci*, 1(1), 56-64.
- Johnson, S. C., Baxter, L. C., Wilder, L. S., Pipe, J. G., Heiserman, J. E., & Prigatano, G. P. (2002). Neural correlates of self-reflection. *Brain*, 125(Pt 8), 1808-1814.
- Johnson, S. C., Ries, M. L., Hess, T. M., Carlsson, C. M., Gleason, C. E., Alexander, A. L., et al. (2007). Effect of Alzheimer disease risk on brain function during self-appraisal in healthy middle-aged adults. *Arch Gen Psychiatry*, 64(10), 1163-1171.
- Johnson, S. C., Schmitz, T. W., Kawahara-Baccus, T. N., Rowley, H. A., Alexander, A. L., Lee, J., et al. (2005). The cerebral response during subjective choice with and without self-reference. *J Cogn Neurosci*, 17(12), 1897-1906.
- Kelley, W. M., Macrae, C. N., Wyland, C. L., Caglar, S., Inati, S., & Heatherton, T. F. (2002). Finding the self? An event-related fMRI study. *J Cogn Neurosci*, 14(5), 785-794.
- Kircher, T. T., Brammer, M., Bullmore, E., Simmons, A., Bartels, M., & David, A. S. (2002). The neural correlates of intentional and incidental self processing. *Neuropsychologia*, 40(6), 683-692.
- Kircher, T. T., Senior, C., Phillips, M. L., Benson, P. J., Bullmore, E. T., Brammer, M., et al. (2000). Towards a functional neuroanatomy of self processing: effects of faces and words. *Brain Res Cogn Brain Res*, 10(1-2), 133-144.
- Kircher, T. T., Senior, C., Phillips, M. L., Rabe-Hesketh, S., Benson, P. J., Bullmore, E. T., et al. (2001). Recognizing one's own face. *Cognition*, 78(1), B1-B15.
- Kjaer, T. W., Nowak, M., & Lou, H. C. (2002). Reflective self-awareness and conscious states: PET evidence for a common midline parietofrontal core. *Neuroimage*, 17(2), 1080-1086.
- Kobayashi, C., Glover, G. H., & Temple, E. (2006). Cultural and linguistic influence on neural bases of 'Theory of Mind': an fMRI study with Japanese bilinguals. *Brain Lang*, 98(2), 210-220.
- Lamm, C., Batson, C. D., & Decety, J. (2007). The neural substrate of human empathy: effects of perspective-taking and cognitive appraisal. *J Cogn Neurosci*, 19(1), 42-58.
- Lawrence, E. J., Shaw, P., Giampietro, V. P., Surguladze, S., Brammer, M. J., & David, A. S. (2006). The role of 'shared representations' in social perception and empathy: an fMRI study. *Neuroimage*, 29(4), 1173-1184.



- Levine, B., Turner, G. R., Tisserand, D., Hevenor, S. J., Graham, S. J., & McIntosh, A. R. (2004). The functional neuroanatomy of episodic and semantic autobiographical remembering: a prospective functional MRI study. *J Cogn Neurosci*, 16(9), 1633-1646.
- Lieberman, M. D., Jarcho, J. M., & Satpute, A. B. (2004). Evidence-based and intuition-based self-knowledge: an fMRI study. *J Pers Soc Psychol*, 87(4), 421-435.
- Lou, H. C., Luber, B., Crupain, M., Keenan, J. P., Nowak, M., Kjaer, T. W., et al. (2004). Parietal cortex and representation of the mental Self. *Proc Natl Acad Sci U S A*, 101(17), 6827-6832.
- Macrae, C. N., Moran, J. M., Heatherton, T. F., Banfield, J. F., & Kelley, W. M. (2004). Medial prefrontal activity predicts memory for self. *Cereb Cortex*, 14(6), 647-654.
- Martin, A., & Weisberg, J. (2003). Neural foundations for understanding social and mechanical concepts. *Cogn Neuropsychol*, 20(3-6), 575-587.
- Mitchell, J. P. (2008). Activity in right temporo-parietal junction is not selective for theory-of-mind. *Cereb Cortex*, 18(2), 262-271.
- Mitchell, J. P., Banaji, M. R., & Macrae, C. N. (2005b). General and specific contributions of the medial prefrontal cortex to knowledge about mental states. *Neuroimage*, 28(4), 757-762.
- Mitchell, J. P., Banaji, M. R., & Macrae, C. N. (2005c). The link between social cognition and self-referential thought in the medial prefrontal cortex. *J Cogn Neurosci*, 17(8), 1306-1315.
- Mitchell, J. P., Cloutier, J., Banaji, M. R., & Macrae, C. N. (2006b). Medial prefrontal dissociations during processing of trait diagnostic and nondiagnostic person information. *Soc Cogn Affect Neurosci*, 1(1), 49-55.
- Mitchell, J. P., Heatherton, T. F., & Macrae, C. N. (2002). Distinct neural systems subserve person and object knowledge. *Proc Natl Acad Sci U S A*, 99(23), 15238-15243.
- Mitchell, J. P., Macrae, C. N., & Banaji, M. R. (2004). Encoding-specific effects of social cognition on the neural correlates of subsequent memory. *J Neurosci*, 24(21), 4912-4917.
- Mitchell, J. P., Macrae, C. N., & Banaji, M. R. (2006a). Dissociable medial prefrontal contributions to judgments of similar and dissimilar others. *Neuron*, 50(4), 655-663.
- Mitchell, J. P., Neil Macrae, C., & Banaji, M. R. (2005a). Forming impressions of people versus inanimate objects: social-cognitive processing in the medial prefrontal cortex. *Neuroimage*, 26(1), 251-257.
- Nakamura, K., Kawashima, R., Sugiura, M., Kato, T., Nakamura, A., Hatano, K., et al. (2001). Neural substrates for recognition of familiar voices: a PET study. *Neuropsychologia*, 39(10), 1047-1054.
- Nunez, J. M., Casey, B. J., Egner, T., Hare, T., & Hirsch, J. (2005). Intentional false responding shares neural substrates with response conflict and cognitive control. *Neuroimage*, 25(1), 267-277.
- Ochsner, K. N., Beer, J. S., Robertson, E. R., Cooper, J. C., Gabrieli, J. D., Kihlstrom, J. F., et al. (2005). The neural correlates of direct and reflected self-knowledge. *Neuroimage*, 28(4), 797-814.
- Ochsner, K. N., Knierim, K., Ludlow, D. H., Hanelin, J., Ramachandran, T., Glover, G., et al. (2004b). Reflecting upon feelings: an fMRI study of neural systems supporting the attribution of emotion to self and other. *J Cogn Neurosci*, 16(10), 1746-1772.
- Ochsner, K. N., Ray, R. D., Cooper, J. C., Robertson, E. R., Chopra, S., Gabrieli, J. D., et al. (2004a). For better or for worse: neural systems supporting the cognitive down- and up-regulation of negative emotion. *Neuroimage*, 23(2), 483-499.

- Ortigue, S., Bianchi-Demicheli, F., Hamilton, A. F., & Grafton, S. T. (2007). The neural basis of love as a subliminal prime: an event-related functional magnetic resonance imaging study. *J Cogn Neurosci*, 19(7), 1218-1230.
- Paulus, M. P., & Frank, L. R. (2003). Ventromedial prefrontal cortex activation is critical for preference judgments. *Neuroreport*, 14(10), 1311-1315.
- Pfeifer, J. H., Lieberman, M. D., & Dapretto, M. (2007). "I know you are but what am I?!": neural bases of self- and social knowledge retrieval in children and adults. *J Cogn Neurosci*, 19(8), 1323-1337.
- Phan, K. L., Taylor, S. F., Welsh, R. C., Decker, L. R., Noll, D. C., Nichols, T. E., et al. (2003). Activation of the medial prefrontal cortex and extended amygdala by individual ratings of emotional arousal: a fMRI study. *Biol Psychiatry*, 53(3), 211-215.
- Piefke, M., Weiss, P. H., Markowitsch, H. J., & Fink, G. R. (2005). Gender differences in the functional neuroanatomy of emotional episodic autobiographical memory. *Hum Brain Mapp*, 24(4), 313-324.
- Piefke, M., Weiss, P. H., Zilles, K., Markowitsch, H. J., & Fink, G. R. (2003). Differential remoteness and emotional tone modulate the neural correlates of autobiographical memory. *Brain*, 126(Pt 3), 650-668.
- Pietrini, P., Guazzelli, M., Basso, G., Jaffe, K., & Grafman, J. (2000). Neural correlates of imaginal aggressive behavior assessed by positron emission tomography in healthy subjects. *Am J Psychiatry*, 157(11), 1772-1781.
- Platek, S. M., Keenan, J. P., Gallup, G. G., Jr., & Mohamed, F. B. (2004). Where am I? The neurological correlates of self and other. *Brain Res Cogn Brain Res*, 19(2), 114-122.
- Platek, S. M., Loughhead, J. W., Gur, R. C., Busch, S., Ruparel, K., Phend, N., et al. (2006). Neural substrates for functionally discriminating self-face from personally familiar faces. *Hum Brain Mapp*, 27(2), 91-98.
- Ramnani, N., & Miall, R. C. (2004). A system in the human brain for predicting the actions of others. *Nat Neurosci*, 7(1), 85-90.
- Ruby, P., & Decety, J. (2003). What you believe versus what you think they believe: a neuroimaging study of conceptual perspective-taking. *Eur J Neurosci*, 17(11), 2475-2480.
- Ruby, P., & Decety, J. (2004). How would you feel versus how do you think she would feel? A neuroimaging study of perspective-taking with social emotions. *J Cogn Neurosci*, 16(6), 988-999.
- Saxe, R., & Kanwisher, N. (2003). People thinking about thinking people. The role of the temporo-parietal junction in "theory of mind". *Neuroimage*, 19(4), 1835-1842.
- Saxe, R., & Powell, L. J. (2006a). It's the thought that counts: specific brain regions for one component of theory of mind. *Psychol Sci*, 17(8), 692-699.
- Saxe, R., Schulz, L. E., & Jiang, Y. V. (2006b). Reading minds versus following rules: dissociating theory of mind and executive control in the brain. *Soc Neurosci*, 1(3-4), 284-298.
- Saxe, R., & Wexler, A. (2005). Making sense of another mind: the role of the right temporo-parietal junction. *Neuropsychologia*, 43(10), 1391-1399.
- Schmitz, T. W., & Johnson, S. C. (2006). Self-appraisal decisions evoke dissociated dorsal-ventral aMPFC networks. *Neuroimage*, 30(3), 1050-1058.
- Schmitz, T. W., Kawahara-Baccus, T. N., & Johnson, S. C. (2004). Metacognitive evaluation, self-relevance, and the right prefrontal cortex. *Neuroimage*, 22(2), 941-947.
- Schnider, A., Treyer, V., & Buck, A. (2000). Selection of currently relevant memories by the human posterior medial orbitofrontal cortex. *J Neurosci*, 20(15), 5880-5884.

- Schulte-Ruther, M., Markowitsch, H. J., Fink, G. R., & Piefke, M. (2007). Mirror neuron and theory of mind mechanisms involved in face-to-face interactions: a functional magnetic resonance imaging approach to empathy. *J Cogn Neurosci*, 19(8), 1354-1372.
- Schultz, J., Friston, K. J., O'Doherty, J., Wolpert, D. M., & Frith, C. D. (2005). Activation in posterior superior temporal sulcus parallels parameter inducing the percept of animacy. *Neuron*, 45(4), 625-635.
- Schultz, J., Imamizu, H., Kawato, M., & Frith, C. D. (2004). Activation of the human superior temporal gyrus during observation of goal attribution by intentional objects. *J Cogn Neurosci*, 16(10), 1695-1705.
- Seger, C. A., Stone, M., & Keenan, J. P. (2004). Cortical Activations during judgments about the self and an other person. *Neuropsychologia*, 42(9), 1168-1177.
- Singer, T., Seymour, B., O'Doherty, J., Kaube, H., Dolan, R. J., & Frith, C. D. (2004). Empathy for pain involves the affective but not sensory components of pain. *Science*, 303(5661), 1157-1162.
- Sommer, M., Dohnel, K., Sodian, B., Meinhardt, J., Thoermer, C., & Hajak, G. (2007). Neural correlates of true and false belief reasoning. *Neuroimage*, 35(3), 1378-1384.
- Spence, S. A., Farrow, T. F., Herford, A. E., Wilkinson, I. D., Zheng, Y., & Woodruff, P. W. (2001). Behavioural and functional anatomical correlates of deception in humans. *Neuroreport*, 12(13), 2849-2853.
- Sugiura, M., Kawashima, R., Nakamura, K., Okada, K., Kato, T., Nakamura, A., et al. (2000). Passive and active recognition of one's own face. *Neuroimage*, 11(1), 36-48.
- Sui, J., & Han, S. (2007). Self-construal priming modulates neural substrates of self-awareness. *Psychol Sci*, 18(10), 861-866.
- Takahashi, H., Koeda, M., Oda, K., Matsuda, T., Matsushima, E., Matsuura, M., et al. (2004a). An fMRI study of differential neural response to affective pictures in schizophrenia. *Neuroimage*, 22(3), 1247-1254.
- Takahashi, H., Yahata, N., Koeda, M., Matsuda, T., Asai, K., & Okubo, Y. (2004b). Brain activation associated with evaluative processes of guilt and embarrassment: an fMRI study. *Neuroimage*, 23(3), 967-974.
- Todorov, A., Gobbini, M. I., Evans, K. K., & Haxby, J. V. (2007). Spontaneous retrieval of affective person knowledge in face perception. *Neuropsychologia*, 45(1), 163-173.
- Treyer, V., Buck, A., & Schneider, A. (2003). Subcortical loop activation during selection of currently relevant memories. *J Cogn Neurosci*, 15(4), 610-618.
- Vogeley, K., Bussfeld, P., Newen, A., Herrmann, S., Happe, F., Falkai, P., et al. (2001). Mind reading: neural mechanisms of theory of mind and self-perspective. *Neuroimage*, 14(1 Pt 1), 170-181.
- Vollm, B. A., Taylor, A. N., Richardson, P., Corcoran, R., Stirling, J., McKie, S., et al. (2006). Neuronal correlates of theory of mind and empathy: a functional magnetic resonance imaging study in a nonverbal task. *Neuroimage*, 29(1), 90-98.
- Zhu, Y., Zhang, L., Fan, J., & Han, S. (2007). Neural basis of cultural influence on self-representation. *Neuroimage*, 34(3), 1310-1316.
- Zysset, S., Huber, O., Samson, A., Ferstl, E. C., & von Cramon, D. Y. (2003). Functional specialization within the anterior medial prefrontal cortex: a functional magnetic resonance imaging study with human subjects. *Neurosci Lett*, 335(3), 183-186.

Supplementary Table 3. MKDA results for contrasts of Self &gt; Baseline, Other &gt; Baseline, and the conjunction of both contrasts

| <b>Region of Activation</b>        | <b>x</b> | <b>y</b> | <b>z</b> | <b>k</b> | <b>max</b> | <b>mean</b> |
|------------------------------------|----------|----------|----------|----------|------------|-------------|
| <b>Self&gt;Baseline</b>            |          |          |          |          |            |             |
| Medial Frontal Gyrus               | -6       | 50       | 4        | 10887    | 0.1901     | 0.058006    |
| Medial Frontal Gyrus               | -6       | 50       | 4        | (L)      | 0.1901     | 0.065304    |
| Medial Frontal Gyrus (BA 10)       | -6       | 56       | 10       | (L)      | 0.174963   | 0.15993     |
| Superior Frontal Gyrus (BA 9)      | -6       | 54       | 32       | (L)      | 0.142003   | 0.064662    |
| Medial Frontal Gyrus (BA 10)       | -4       | 62       | 20       | (L)      | 0.139195   | 0.116295    |
| Superior Frontal Gyrus (BA 8)      | -10      | 48       | 40       | (L)      | 0.123447   | 0.064207    |
| Extra-Nuclear (BA 13)              | -28      | 16       | -12      | (L)      | 0.114292   | 0.050785    |
| Inferior Frontal Gyrus (BA 9)      | -50      | 22       | 18       | (L)      | 0.109287   | 0.053292    |
| Inferior Frontal Gyrus (BA 47)     | -32      | 16       | -22      | (L)      | 0.107883   | 0.086847    |
| Inferior Frontal Gyrus (BA 47)     | -34      | 20       | -16      | (L)      | 0.107486   | 0.06825     |
| Sub-Gyral (BA 47)                  | -26      | 22       | -14      | (L)      | 0.102603   | 0.05251     |
| Superior Frontal Gyrus (BA 8)      | -12      | 46       | 48       | (L)      | 0.095035   | 0.065875    |
| Medial Frontal Gyrus (BA 32)       | 4        | 8        | 50       | (L)      | 0.093417   | 0.049687    |
| Anterior Cingulate (BA 24)         | 4        | 26       | 26       | (L)      | 0.093112   | 0.053182    |
| Inferior Frontal Gyrus (BA 9)      | -44      | 22       | 18       | (L)      | 0.092318   | 0.072638    |
| Inferior Frontal Gyrus (BA 47)     | -42      | 16       | -10      | (L)      | 0.092196   | 0.059195    |
| Cingulate Gyrus (BA 32)            | 0        | 28       | 36       | (L)      | 0.089084   | 0.069355    |
| Lentiform Nucleus (Putamen)        | -16      | 8        | -8       | (L)      | 0.084841   | 0.047243    |
| Anterior Cingulate (BA 32)         | 0        | 34       | 26       | (L)      | 0.083193   | 0.06139     |
| Superior Frontal Gyrus (BA 6)      | -10      | 28       | 56       | (L)      | 0.082156   | 0.058219    |
| Caudate (Caudate Body)             | -10      | 12       | 4        | (L)      | 0.080508   | 0.047587    |
| Cingulate Gyrus (BA 24)            | 6        | -14      | 42       | (L)      | 0.078433   | 0.043451    |
| Insula (BA 13)                     | -36      | -4       | 8        | (L)      | 0.073977   | 0.046236    |
| Medial Frontal Gyrus (BA 6)        | 6        | 8        | 56       | (L)      | 0.073      | 0.050368    |
| Cingulate Gyrus (BA 32)            | 8        | 24       | 32       | (L)      | 0.072939   | 0.053735    |
| Medial Frontal Gyrus (BA 9)        | 4        | 40       | 26       | (L)      | 0.071322   | 0.053749    |
| Caudate (Caudate Head)             | -8       | 16       | -2       | (L)      | 0.071108   | 0.057439    |
| Superior Frontal Gyrus (BA 6)      | -2       | 20       | 62       | (L)      | 0.070284   | 0.046285    |
| Cingulate Gyrus (BA 24)            | -4       | -2       | 38       | (L)      | 0.068728   | 0.053512    |
| Superior Temporal Gyrus (BA 38)    | -50      | 0        | -18      | (L)      | 0.067354   | 0.047656    |
| Lentiform Nucleus (Putamen)        | -28      | 0        | 0        | (L)      | 0.064638   | 0.047837    |
| Superior Temporal Gyrus (BA 38)    | -42      | 14       | -34      | (L)      | 0.062899   | 0.052272    |
| Medial Frontal Gyrus (BA 8)        | 0        | 30       | 44       | (L)      | 0.062746   | 0.050686    |
| Medial Frontal Gyrus (BA 9)        | 16       | 28       | 30       | (L)      | 0.061892   | 0.058726    |
| Superior Frontal Gyrus (BA 10)     | -24      | 50       | 24       | (L)      | 0.06061    | 0.047225    |
| Thalamus (Ventral Lateral Nucleus) | -12      | -8       | 4        | (L)      | 0.057863   | 0.040372    |
| Thalamus                           | 2        | 0        | 8        | (L)      | 0.054567   | 0.037564    |
| Inferior Frontal Gyrus (BA 44)     | -56      | 16       | 6        | (L)      | 0.054231   | 0.038281    |
| Lentiform Nucleus (Putamen)        | -24      | -6       | 0        | (L)      | 0.053499   | 0.042407    |
| Thalamus (Medial Dorsal Nucleus)   | -4       | -16      | 2        | (L)      | 0.051546   | 0.038484    |
| Anterior Cingulate (BA 24)         | 2        | 24       | -6       | (L)      | 0.050417   | 0.047404    |
| Cingulate Gyrus (BA 24)            | 8        | -4       | 36       | (L)      | 0.049043   | 0.048146    |
| Superior Temporal Gyrus (BA 22)    | -52      | 10       | 0        | (L)      | 0.045412   | 0.039918    |

|                                |     |     |     |     |          |          |
|--------------------------------|-----|-----|-----|-----|----------|----------|
| Superior Frontal Gyrus (BA 6)  | 14  | 16  | 58  | (L) | 0.045137 | 0.039787 |
| Cingulate Gyrus (BA 31)        | -2  | -56 | 30  | 937 | 0.140233 | 0.072505 |
| Cingulate Gyrus (BA 31)        | -2  | -56 | 30  | (L) | 0.140233 | 0.073199 |
| Posterior Cingulate (BA 29)    | -4  | -56 | 12  | (L) | 0.067446 | 0.056083 |
| Angular Gyrus (BA 39)          | -44 | -70 | 32  | 982 | 0.131413 | 0.066291 |
| Angular Gyrus (BA 39)          | -44 | -70 | 32  | (L) | 0.131413 | 0.065408 |
| Middle Temporal Gyrus (BA 39)  | -50 | -62 | 22  | (L) | 0.115513 | 0.097126 |
| Supramarginal Gyrus (BA 40)    | -54 | -48 | 22  | (L) | 0.079501 | 0.067413 |
| Inferior Frontal Gyrus (BA 47) | 36  | 18  | -24 | 268 | 0.102786 | 0.077427 |

**Other > Baseline**

|                                  |     |     |     |      |          |          |
|----------------------------------|-----|-----|-----|------|----------|----------|
| Supramarginal Gyrus (BA 40)      | 58  | -50 | 22  | 1236 | 0.179357 | 0.07867  |
| Supramarginal Gyrus (BA 40)      | 58  | -50 | 22  | (L)  | 0.179357 | 0.078995 |
| Middle Temporal Gyrus (BA 39)    | 56  | -68 | 12  | (L)  | 0.053987 | 0.053863 |
| Superior Temporal Gyrus (BA 39)  | -56 | -56 | 22  | 5215 | 0.176763 | 0.053145 |
| Superior Temporal Gyrus (BA 39)  | -56 | -56 | 22  | (L)  | 0.176763 | 0.062563 |
| Middle Temporal Gyrus (BA 21)    | -52 | -4  | -24 | (L)  | 0.094333 | 0.043192 |
| Middle Temporal Gyrus (BA 21)    | -60 | -8  | -14 | (L)  | 0.088412 | 0.050677 |
| Superior Temporal Gyrus (BA 22)  | -58 | -12 | -2  | (L)  | 0.086825 | 0.055525 |
| Superior Temporal Gyrus (BA 38)  | -50 | 6   | -18 | (L)  | 0.0712   | 0.043823 |
| Superior Temporal Gyrus (BA 38)  | -44 | 8   | -22 | (L)  | 0.067415 | 0.040682 |
| Superior Temporal Gyrus (BA 22)  | -60 | -34 | 6   | (L)  | 0.062197 | 0.047654 |
| Inferior Frontal Gyrus (BA 47)   | -42 | 14  | -12 | (L)  | 0.059297 | 0.036829 |
| Superior Temporal Gyrus (BA 22)  | -56 | -40 | 2   | (L)  | 0.058718 | 0.043502 |
| Inferior Parietal Lobule (BA 40) | -34 | -52 | 50  | (L)  | 0.05591  | 0.042383 |
| Sub-Gyral (BA 40)                | -26 | -42 | 52  | (L)  | 0.052675 | 0.038874 |
| Clastrum                         | -30 | 8   | -12 | (L)  | 0.046388 | 0.035353 |
| Superior Occipital Gyrus (BA 19) | -28 | -74 | 28  | (L)  | 0.04294  | 0.034091 |
| Superior Temporal Gyrus (BA 41)  | -52 | -32 | 10  | (L)  | 0.040773 | 0.040773 |
| Medial Frontal Gyrus (BA 10)     | -2  | 58  | 20  | 5519 | 0.17481  | 0.063995 |
| Medial Frontal Gyrus (BA 10)     | -2  | 58  | 20  | (L)  | 0.17481  | 0.062117 |
| Superior Frontal Gyrus (BA 9)    | 0   | 58  | 26  | (L)  | 0.163671 | 0.124592 |
| Superior Frontal Gyrus (BA 9)    | -2  | 52  | 36  | (L)  | 0.160161 | 0.124576 |
| Medial Frontal Gyrus (BA 6)      | 4   | 32  | 38  | (L)  | 0.05179  | 0.038374 |
| Anterior Cingulate (BA 32)       | 0   | 40  | 20  | (L)  | 0.043184 | 0.035713 |
| Medial Frontal Gyrus (BA 9)      | 8   | 42  | 20  | (L)  | 0.042055 | 0.033592 |
| Cingulate Gyrus (BA 31)          | -4  | -56 | 30  | 1478 | 0.162603 | 0.069189 |
| Cingulate Gyrus (BA 31)          | -4  | -56 | 30  | (L)  | 0.162603 | 0.070814 |
| Precuneus (BA 7)                 | -4  | -50 | 52  | (L)  | 0.083041 | 0.056888 |
| Precuneus (BA 7)                 | 2   | -46 | 52  | (L)  | 0.07123  | 0.054777 |
| Precuneus (BA 7)                 | 8   | -50 | 60  | (L)  | 0.044221 | 0.044221 |
| Middle Temporal Gyrus (BA 21)    | 58  | -16 | -12 | 1    | 0.102878 | 0.102878 |

**(Self > Baseline) &  
(Other > Baseline)**

|                               |    |    |    |      |          |          |
|-------------------------------|----|----|----|------|----------|----------|
| Medial Frontal Gyrus (BA 10)  | -6 | 56 | 10 | 4054 | 0.149576 | 0.068495 |
| Medial Frontal Gyrus (BA 10)  | -6 | 56 | 10 | (L)  | 0.149576 | 0.067442 |
| Medial Frontal Gyrus (BA 9)   | -6 | 56 | 22 | (L)  | 0.13788  | 0.121538 |
| Superior Frontal Gyrus (BA 9) | -6 | 54 | 32 | (L)  | 0.13541  | 0.106867 |



|                                 |     |     |     |     |          |          |
|---------------------------------|-----|-----|-----|-----|----------|----------|
| Superior Frontal Gyrus (BA 9)   | -12 | 48  | 38  | (L) | 0.123379 | 0.098882 |
| Medial Frontal Gyrus (BA 6)     | -4  | 28  | 38  | (L) | 0.068469 | 0.051826 |
| Anterior Cingulate (BA 32)      | 0   | 34  | 24  | (L) | 0.050161 | 0.040615 |
| Cingulate Gyrus (BA 31)         | -4  | -56 | 30  | 640 | 0.149186 | 0.077302 |
| Middle Temporal Gyrus (BA 39)   | -50 | -62 | 22  | 813 | 0.13303  | 0.07104  |
| Middle Temporal Gyrus (BA 39)   | -50 | -62 | 22  | (L) | 0.13303  | 0.070497 |
| Supramarginal Gyrus (BA 40)     | -56 | -52 | 20  | (L) | 0.10394  | 0.093737 |
| Middle Temporal Gyrus (BA 21)   | -60 | -6  | -20 | 551 | 0.072278 | 0.048002 |
| Middle Temporal Gyrus (BA 21)   | -60 | -6  | -20 | (L) | 0.072278 | 0.049252 |
| Middle Temporal Gyrus (BA 21)   | -52 | -2  | -24 | (L) | 0.068295 | 0.058753 |
| Inferior Frontal Gyrus (BA 47)  | -42 | 16  | -14 | (L) | 0.06381  | 0.040849 |
| Clastrum                        | -30 | 8   | -12 | (L) | 0.057924 | 0.044959 |
| Posterior Cingulate (BA 23)     | 0   | -56 | 12  | 3   | 0.053463 | 0.053463 |
| Inferior Frontal Gyrus (BA 47)  | -48 | 18  | -10 | 4   | 0.050713 | 0.047169 |
| Superior Temporal Gyrus (BA 38) | -46 | 14  | -26 | 3   | 0.035918 | 0.035918 |

All regions are significant at FWE,  $p < 0.05$ . Coordinates are in MNI space. 'L' reflects local maxima.

Supplementary Table 4. MKDA results for contrasts of Self &gt; Other and Other &gt; Self.

| <b>Region of Activation</b>        | <b>x</b> | <b>y</b> | <b>z</b> | <b>k</b> | <b>max</b> | <b>mean</b> |
|------------------------------------|----------|----------|----------|----------|------------|-------------|
| <b>Self &gt; Other</b>             |          |          |          |          |            |             |
| Medial Frontal Gyrus               | -10      | 50       | 6        | 303      | 0.118686   | 0.080394    |
| Medial Frontal Gyrus               | -10      | 50       | 6        | (L)      | 0.118686   | 0.080555    |
| Anterior Cingulate (BA 32)         | -2       | 48       | 4        | (L)      | 0.114078   | 0.093803    |
| Medial Frontal Gyrus (BA 10)       | -10      | 62       | 6        | (L)      | 0.112766   | 0.078437    |
| Insula (BA 13)                     | -36      | 20       | -8       | 3455     | 0.115268   | 0.047111    |
| Insula (BA 13)                     | -36      | 20       | -8       | (L)      | 0.115268   | 0.043071    |
| Inferior Frontal Gyrus (BA 47)     | -32      | 16       | -22      | (L)      | 0.107944   | 0.054159    |
| Inferior Frontal Gyrus (BA 47)     | -30      | 20       | -14      | (L)      | 0.106113   | 0.08976     |
| Caudate                            | -12      | 8        | 8        | (L)      | 0.097415   | 0.05015     |
| Inferior Frontal Gyrus (BA 47)     | -42      | 30       | -12      | (L)      | 0.085055   | 0.069607    |
| Insula (BA 13)                     | -36      | -4       | 8        | (L)      | 0.074038   | 0.046793    |
| Inferior Frontal Gyrus (BA 47)     | -48      | 24       | -6       | (L)      | 0.073183   | 0.061407    |
| Lentiform Nucleus (Putamen)        | -28      | 0        | 0        | (L)      | 0.064669   | 0.041512    |
| Thalamus (Ventral Lateral Nucleus) | -12      | -8       | 4        | (L)      | 0.057894   | 0.036804    |
| Thalamus (Medial Dorsal Nucleus)   | -4       | -16      | 2        | (L)      | 0.051576   | 0.034689    |
| Thalamus                           | -10      | -14      | 4        | (L)      | 0.051576   | 0.042724    |
| Lentiform Nucleus (Putamen)        | -22      | -6       | 8        | (L)      | 0.044191   | 0.035592    |
| Superior Temporal Gyrus (BA 38)    | -60      | 10       | -20      | (L)      | 0.041322   | 0.03169     |
| Thalamus                           | 8        | -8       | 4        | (L)      | 0.039186   | 0.031547    |
| <b>Other &gt; Self</b>             |          |          |          |          |            |             |
| Middle Temporal Gyrus (BA 39)      | -46      | -64      | 20       | 285      | 0.139897   | 0.07744     |
| Middle Temporal Gyrus (BA 39)      | -46      | -64      | 20       | (L)      | 0.139897   | 0.075677    |
| Superior Temporal Gyrus (BA 39)    | -56      | -56      | 22       | (L)      | 0.127232   | 0.089258    |
| Superior Temporal Gyrus (BA 39)    | 52       | -50      | 22       | 832      | 0.139286   | 0.061613    |
| Superior Temporal Gyrus (BA 39)    | 52       | -50      | 22       | (L)      | 0.139286   | 0.062193    |
| Middle Temporal Gyrus (BA 39)      | 56       | -68      | 12       | (L)      | 0.05417    | 0.048819    |
| Cuneus (BA 7)                      | 4        | -62      | 36       | 160      | 0.109622   | 0.071824    |
| Superior Frontal Gyrus (BA 9)      | 0        | 56       | 34       | 1011     | 0.10712    | 0.057389    |
| Superior Frontal Gyrus (BA 9)      | 0        | 56       | 34       | (L)      | 0.10712    | 0.055193    |
| Superior Frontal Gyrus (BA 9)      | -2       | 48       | 34       | (L)      | 0.106632   | 0.06663     |
| Medial Frontal Gyrus (BA 8)        | 0        | 48       | 42       | (L)      | 0.101077   | 0.07392     |
| Medial Frontal Gyrus (BA 10)       | -8       | 56       | 20       | (L)      | 0.088595   | 0.05454     |
| Superior Frontal Gyrus (BA 9)      | 0        | 58       | 26       | (L)      | 0.087924   | 0.067081    |
| Superior Frontal Gyrus (BA 9)      | 10       | 56       | 38       | (L)      | 0.074007   | 0.058198    |
| Medial Frontal Gyrus (BA 8)        | -2       | 38       | 46       | (L)      | 0.06943    | 0.056572    |
| Middle Temporal Gyrus (BA 21)      | 58       | -16      | -12      | 1        | 0.103214   | 0.103214    |

All regions are significant at FWE,  $p < 0.05$ . Coordinates are in MNI space. 'L' reflects local maxima.
